# Supplementary material for: Hyperspectral ultraviolet to shortwave infrared characteristics of marine-harvested, washed-ashore and virgin plastics
Source: Copernicus journal article supplement (doi:10.5194/essd-12-77-2020), 2020-01-13
Supplement: Supplementary file 1 [file essd-12-77-2020-supplement.zip]

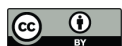

## *Supplement of*

# **Hyperspectral ultraviolet to shortwave infrared characteristics of marine-harvested, washed-ashore and virgin plastics**

**Shungudzemwoyo P. Garaba and Heidi M. Dierssen**

*Correspondence to:* Shungudzemwoyo P. Garaba ([shungu.garaba@uni-oldenburg.de](mailto:shungu.garaba@uni-oldenburg.de))

- [essd-12-77-2020-supplement-title-page.pdf](#)
- [Garaba\\_Dierssen\\_2019.xlsx](#)

The copyright of individual parts of the supplement might differ from the CC BY 4.0 License.
